# Supplementary material
Source: publisher site journal article supplement (https://www.spandidos-publications.com/184/downloadSupplementary)
Supplement: Supplementary file 1 [file downloadSupplementary]

Figure S1. TNF- $\alpha$  cytotoxicity by CCK-8 was assessed for concentration selection. 16HBE cell viability in response to TNF- $\alpha$  (10-100 ng/ml) treatment for 24 h assessed by CCK-8 assay. \*\*P<0.01 vs. the empty control group (TNF- $\alpha$  0 ng/ml). CCK, cell counting kit; TNF, tumor necrosis factor.

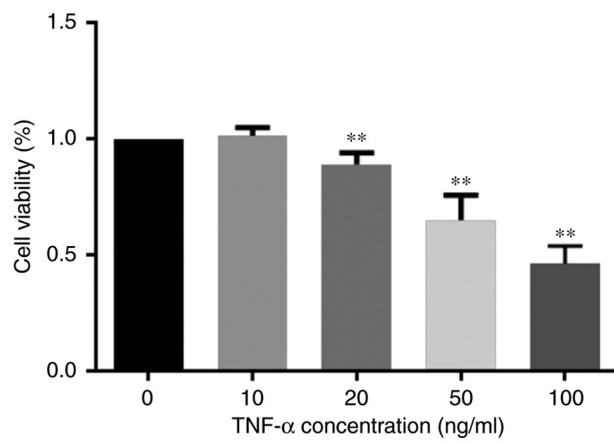

Table SI. Pathology classification standard of lung injury.

| Levels | Standards                                                                                                                                          |
|--------|----------------------------------------------------------------------------------------------------------------------------------------------------|
| 0      | The alveolar wall was intact without thickening, inflammatory infiltration and congestion.                                                         |
| 1      | The alveolar wall was slightly infiltrated by diffuse inflammatory cells (neutrophils), and the alveolar wall was not thickened.                   |
| 2      | The alveolar wall was markedly and extensively infiltrated by inflammatory cells (neutrophils and monocyte) and slightly thickened (1-2 time).     |
| 3      | Severe inflammatory cell infiltration to the alveolar wall, slightly thickening of the alveolar wall in some areas by 2-3 times.                   |
| 4      | Severe inflammatory cell infiltration to the alveolar wall, marked thickening of the alveolar wall and consolidation of 25-50% of the lung tissue. |
| 5      | Severe inflammatory cell infiltration to the alveolar wall, marked thickening of the alveolar wall and consolidation of the lung tissue >50%.      |
